# Supplementary material for: Accuracy of digital measurement for quantitative and qualitative indicators of wound healing and repair: a systematic review protocol
Source: HighWire-hosted journal article supplement (doi:10.1136/bmjopen-2024-085969), 2024-05-01
Supplement: bmjopen-2024-085969supp002_data_supplement.pdf [file bmjopen-2024-085969supp002_data_supplement.pdf]

## Systematic Review -Research Equation

|    |                                                                                                                                                                                                                                                                                                                                                                                                                                                                                                                                                                                                                                                                                                                                                                                                                                                                                                                                                                                                                                                                                                                                                                                                                                                                                                                                                                                                                                                                                                                                                                                                                                                                                                                 |
|----|-----------------------------------------------------------------------------------------------------------------------------------------------------------------------------------------------------------------------------------------------------------------------------------------------------------------------------------------------------------------------------------------------------------------------------------------------------------------------------------------------------------------------------------------------------------------------------------------------------------------------------------------------------------------------------------------------------------------------------------------------------------------------------------------------------------------------------------------------------------------------------------------------------------------------------------------------------------------------------------------------------------------------------------------------------------------------------------------------------------------------------------------------------------------------------------------------------------------------------------------------------------------------------------------------------------------------------------------------------------------------------------------------------------------------------------------------------------------------------------------------------------------------------------------------------------------------------------------------------------------------------------------------------------------------------------------------------------------|
| #1 | <p>'Foot, Diabetic' OR 'Diabetic Feet' OR 'Feet, Diabetic' OR 'Foot Ulcer, Diabetic' OR 'Foot Ulcers' OR 'Ulcer, Foot' OR 'Ulcers, Foot' OR 'Plantar Ulcer' OR 'Plantar Ulcers' OR 'Ulcer, Plantar' OR 'Ulcers, Plantar' OR 'Ulcer, Varicose' OR 'Ulcers, Varicose' OR 'Varicose Ulcers' OR 'Venous Stasis Ulcers' OR 'Stasis Ulcer' OR 'Venous, Stasis Ulcers' OR 'Venous, Ulcer' OR 'Venous Stasis' OR 'Ulcers, Venous Stasis' OR 'Venous Stasis Ulcer' OR 'Venous Hypertension Ulcers' OR 'Hypertension Ulcer, Venous' OR 'Hypertension Ulcers, Venous' OR 'Ulcer, Venous Hypertension' OR 'Ulcers, Venous Hypertension' OR 'Venous Hypertension Ulcer' OR 'Venous Ulcer' OR 'Ulcer, Venous' OR 'Ulcers, Venous' OR 'Venous Ulcers' OR 'Stasis Ulcer' OR 'Stasis Ulcers' OR 'Ulcer, Stasis' OR 'Ulcers, Stasis' OR 'Skin Ulcers' OR 'Ulcer, Skin' OR 'Ulcers, Skin' OR 'Leg Ulcers' OR 'Ulcer, Leg' OR 'Ulcers, Leg' OR 'Pressure Ulcers' OR 'Ulcer, Pressure' OR 'Ulcers, Pressure' OR 'Bedsore' OR 'Bedsore' OR 'Pressure Sore' OR 'Pressure Sores' OR 'Sore, Pressure' OR 'Sores, Pressure' OR 'Bed Sores' OR 'Bed Sore' OR 'Sore, Bed' OR 'Sores, Bed' OR 'Decubitus Ulcer' OR 'Decubitus Ulcers' OR 'Ulcer, Decubitus' OR 'Ulcers, Decubitus' OR 'Injuries and Wounds' OR 'Wounds and Injury' OR 'Injury and Wounds' OR 'Wounds, Injury' OR 'Trauma' OR 'Traumas' OR 'Injuries, Wounds' OR 'Research-Related Injuries' OR 'Injuries, Research-Related' OR 'Injury, Research-Related' OR 'Research Related Injuries' OR 'Research-Related Injury' OR 'Injuries' OR 'Injury' OR 'Wounds' OR 'Wound'</p>                                                                                                   |
| #2 | <p>'Healing, Wound' OR 'Healings, Wound' OR 'Wound Healings' OR 'Re-Epithelialization' OR 'Re Epithelialization' OR 'Wound Epithelialization' OR 'Epithelialization, Wound' OR 'Adhesive, Fibrin Tissue' OR 'Tissue Adhesive, Fibrin' OR 'Fibrin Adhesive' OR 'Adhesive, Fibrin' OR 'Fibrin Glue' OR 'Glue, Fibrin' OR 'Fibrinogen Adhesive' OR 'Adhesive, Fibrinogen' OR 'Fibrin Sealant System' OR 'Sealant System, Fibrin' OR 'Autologous Fibrin Tissue Adhesive' OR 'Fibrin Sealant' OR 'Sealant, Fibrin' OR 'Crosseal' OR 'Fibrin Klebe System Immuno' OR 'Transglutine' OR 'Fibrin Sealant, Human' OR 'Human Fibrin Sealant' OR 'Sealant, Human Fibrin' OR 'Tisseel' OR 'Tissel' OR 'Tissucol' OR 'Beriplast' OR 'Fibrin Seal' OR 'Seal, Fibrin'</p>                                                                                                                                                                                                                                                                                                                                                                                                                                                                                                                                                                                                                                                                                                                                                                                                                                                                                                                                                      |
| #3 | <p>'Imaging, Multimodal' OR 'Hybrid Imaging' OR 'Imaging, Hybrid' OR 'Multimodal Imaging' OR 'Computer-Assisted Image Interpretation' OR 'Computer-Assisted Image Interpretations' OR 'Image Interpretations, Computer-Assisted' OR 'Interpretation, Computer-Assisted Image' OR 'Interpretations, Computer-Assisted Image' OR 'Image Interpretation, Computer Assisted' OR 'Computer-Assisted Signal Processing' OR 'Signal Processing, Computer Assisted' OR 'Signal Processing, Digital' OR 'Digital Signal Processing' OR 'Signal Interpretation, Computer-Assisted' OR 'Computer-Assisted Signal Interpretation' OR 'Computer-Assisted Signal Interpretations' OR 'Interpretation, Computer-Assisted Signal' OR 'Interpretations, Computer-Assisted Signal' OR 'Signal Interpretation, Computer Assisted' OR 'Signal Interpretations, Computer-Assisted' OR 'Application, Mobile' OR 'Applications, Mobile' OR 'Mobile Application' OR 'Mobile Apps' OR 'App, Mobile' OR 'Apps, Mobile' OR 'Mobile App' OR 'Portable Software Apps' OR 'App, Portable Software' OR 'Portable Software App' OR 'Software App, Portable' OR 'Portable Software Applications' OR 'Application, Portable Software' OR 'Portable Software Application' OR 'Software Application, Portable' OR 'Smartphone Apps' OR 'App, Smartphone' OR 'Apps, Smartphone' OR 'Smartphone App' OR 'Portable Electronic Apps' OR 'App, Portable Electronic' OR 'Electronic App, Portable' OR 'Portable Electronic App' OR 'Portable Electronic Applications' OR 'Application, Portable Electronic' OR 'Electronic Application, Portable' OR 'Portable Electronic Application' OR 'Computer Software' OR 'Software, Computer' OR 'Open Source</p> |

|    |                                                                                                                                                                                                                                                                                                                                                                                                                                                                                                                                                                                                                                                                                                                                                                                                                                                                                                                                                                                                                                                                                                                                                                                                                                                                                                                                                                                                                                                                                                                                                                                              |
|----|----------------------------------------------------------------------------------------------------------------------------------------------------------------------------------------------------------------------------------------------------------------------------------------------------------------------------------------------------------------------------------------------------------------------------------------------------------------------------------------------------------------------------------------------------------------------------------------------------------------------------------------------------------------------------------------------------------------------------------------------------------------------------------------------------------------------------------------------------------------------------------------------------------------------------------------------------------------------------------------------------------------------------------------------------------------------------------------------------------------------------------------------------------------------------------------------------------------------------------------------------------------------------------------------------------------------------------------------------------------------------------------------------------------------------------------------------------------------------------------------------------------------------------------------------------------------------------------------|
|    | Software' OR 'Open Source Softwares' OR 'Software, Open Source' OR 'Softwares, Open Source' OR 'Source Software, Open' OR 'Source Softwares, Open' OR 'Computer Programs' OR 'Computer Program' OR 'Program, Computer' OR 'Programs, Computer' OR 'Software Tools' OR 'Software Tool' OR 'Tool, Software' OR 'Tools, Software' OR 'Software Engineering' OR 'Engineering, Software' OR 'Computer Applications Software' OR 'Applications Software, Computer' OR 'Applications Softwares, Computer' OR 'Computer Applications Softwares' OR 'Software, Computer Applications' OR 'Softwares, Computer Applications' OR 'Computer Software Applications' OR 'Application, Computer Software' OR 'Applications, Computer Software' OR 'Computer Software Application' OR 'Software Application, Computer' OR 'Software Applications, Computer' OR 'Computer Programs and Programming' OR 'Software Algorithm' OR 'Software Algorithms' OR 'Algorithm, Software' OR 'Intelligence, Artificial' OR 'Computational Intelligence' OR 'Intelligence, Computational' OR 'Machine Intelligence' OR 'Intelligence, Machine' OR 'Computer Reasoning' OR 'Reasoning, Computer' OR 'AI (Artificial Intelligence)' OR 'Computer Vision Systems' OR 'Computer Vision System' OR 'System, Computer Vision' OR 'Systems, Computer Vision' OR 'Vision System, Computer' OR 'Vision Systems, Computer' OR 'Knowledge Acquisition (Computer)' OR 'Acquisition, Knowledge (Computer)' OR 'Knowledge Representation (Computer)' OR 'Knowledge Representations (Computer)' OR 'Representation, Knowledge (Computer)' |
| #4 | #1 AND #2 (population)<br>AND #3 (intervention)                                                                                                                                                                                                                                                                                                                                                                                                                                                                                                                                                                                                                                                                                                                                                                                                                                                                                                                                                                                                                                                                                                                                                                                                                                                                                                                                                                                                                                                                                                                                              |
